# Supplementary material
Source: PubMed Central journal article supplement (PMC3911070)
Supplement: AEM.03254-13_zam999105142so1.pdf [file AEM.03254-13_zam999105142so1.pdf]

A

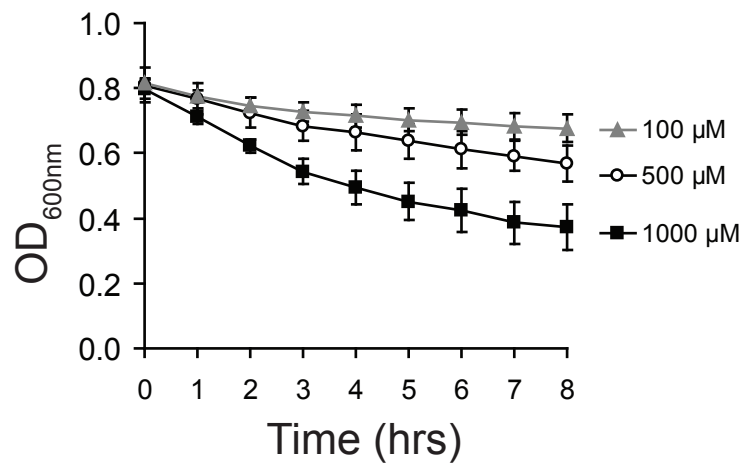

B

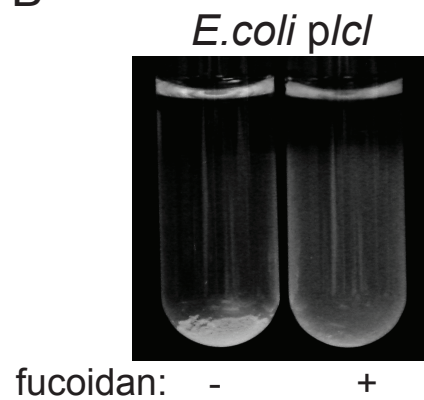

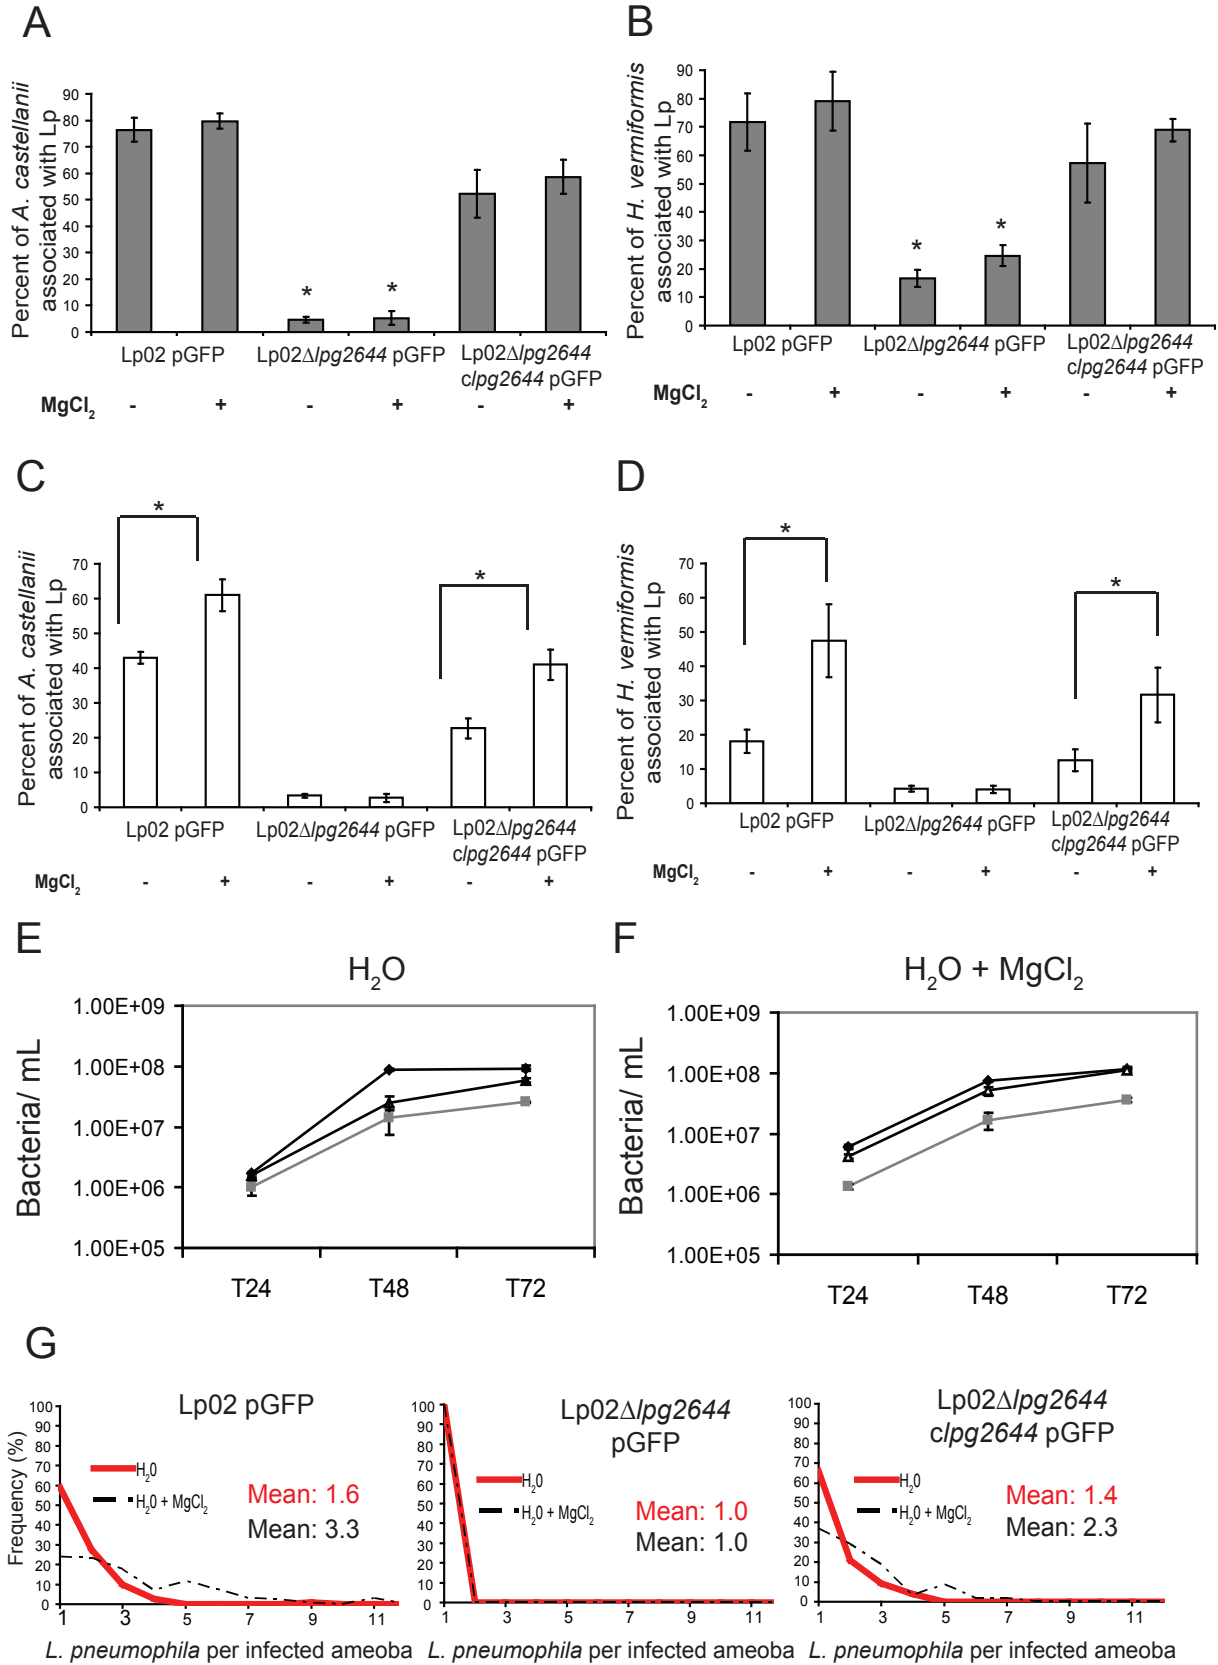

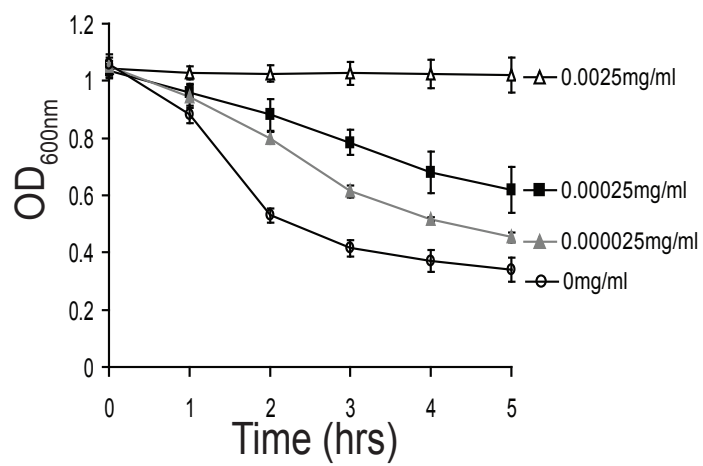

anti-FlaA

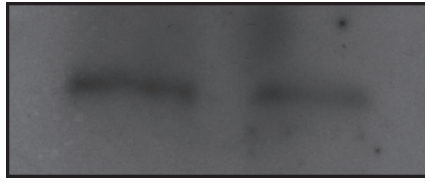

anti-Icdh

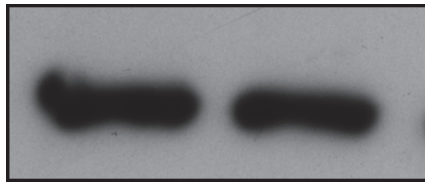

Lp02  
pGFP

Lp02Δ/pg2644  
pGFP

Table S1. Primers used in this study

| Code | Primer                            | Amplification target | Sequence 5' to 3'               |
|------|-----------------------------------|----------------------|---------------------------------|
| 1    | <i>lpg2644</i> F                  | <i>lpg2644</i>       | GAAATAAAGAATGATACATCGA          |
| 2    | <i>lpg2644</i> R                  |                      | GCAAAGCGAATTTATGAACA            |
| 3    | <i>lpg2644</i><br><i>Bsp</i> 1 F  |                      | TGCGTATCATGATACATCGAAATAAAGTC   |
| 4    | <i>lpg2644</i><br><i>Eco</i> R1 R |                      | GTTACGAATTCTTAAAAGGCTCTTACAGCAC |

**Figure S1. Lcl promotes divalent cation dependent sedimentation in *E.coli* and that is inhibited by fucoidan.** (A) Sedimentation kinetics of *E.coli plcl* in deionized water in the presence of 1000 $\mu$ M, 500 $\mu$ M and 100 $\mu$ M MgCl<sub>2</sub>. (B) Sedimentation of *E. coli plcl* in deionized water with 1000 $\mu$ M MgCl<sub>2</sub> in the absence or presence of 0.25 mg/ml fucoidan.

**Figure S2. Lcl does not influence intracellular replication rate of *L. pneumophila* in *A. castellanii*.** Infection of *A. castellanii* by Lp02 pGFP, Lp02 $\Delta$ lpg2644 pGFP and Lp02 $\Delta$ lpg2644 clpg2644 pGFP in deionized water in the absence or presence of 500 $\mu$ M MgCl<sub>2</sub> measured by microscopy (A) after centrifugation (grey bars) and (C) in non-centrifuged conditions (white bars). Infection of *H. vermiformis* in deionized water in the absence or presence of 500 $\mu$ M MgCl<sub>2</sub> measured by flow cytometry (B) after centrifugation (grey bars) and (D) in non-centrifuged conditions (white bars). Release of Lp02 pGFP (black diamonds), Lp02 $\Delta$ lpg2644 pGFP (grey squares) and Lp02 $\Delta$ lpg2644 clpg2644 pGFP (white triangles) into the supernatant measured by flow cytometry during *A. castellanii* infections performed in (E) deionized water and in (F) deionized water with 500 $\mu$ M MgCl<sub>2</sub>. (G) Quantification of the number of *L. pneumophila* per infected *A. castellanii* in non-centrifuged conditions in the absence or presence of 500 $\mu$ M MgCl<sub>2</sub> water in deionized water.

**Figure S3. Fucoidan inhibits *L. pneumophila* sedimentation in a dose dependent manner.** Sedimentation kinetics of Lp02 in deionized water 500 $\mu$ M MgCl<sub>2</sub> with the addition of 0, 2.5X10<sup>-5</sup>, 2.5X10<sup>-4</sup> and 2.5X10<sup>-3</sup> mg /ml fucoidan.

**Figure S4. Deletion of Lcl does not impact flagella expression.** Anti-FlaA immunoblots with cell lysate from Lp02 pGFP and Lp02Δ*lpg2644* pGFP.

**Table S1. Primers used in this study**
